# Supplementary material
Source: publisher figshare collection journal article supplement (https://acs.figshare.com/ndownloader/files/5871057)
Supplement: Supplementary file 1 [file 5871057]

 
# om0006209.cif

data_k232 
;
 ?
;
 
_audit_creation_method            SHELXL-97 
_chemical_name_systematic         di(bis(TMS)benzyl)calcium.THF2 
_chemical_name_common             ? 
_chemical_formula_moiety          ? 
_chemical_formula_sum 
 'C17 H31 Ca0.50 O Si2' 
_chemical_formula_weight          327.64 
 
loop_ 
 _atom_type_symbol 
 _atom_type_description 
 _atom_type_scat_dispersion_real 
 _atom_type_scat_dispersion_imag 
 _atom_type_scat_source 
 'C'  'C'   0.0033   0.0016 
 'International Tables Vol C Tables 4.2.6.8 and 6.1.1.4' 
 'H'  'H'   0.0000   0.0000 
 'International Tables Vol C Tables 4.2.6.8 and 6.1.1.4' 
 'Si'  'Si'   0.0817   0.0704 
 'International Tables Vol C Tables 4.2.6.8 and 6.1.1.4' 
 'Ca'  'Ca'   0.2262   0.3064 
 'International Tables Vol C Tables 4.2.6.8 and 6.1.1.4' 
 'O'  'O'   0.0106   0.0060 
 'International Tables Vol C Tables 4.2.6.8 and 6.1.1.4' 
 
_symmetry_cell_setting            monoclinic? 
_symmetry_space_group_name_H-M    C2/c 
 
loop_ 
 _symmetry_equiv_pos_as_xyz 
 'x, y, z' 
 '-x, y, -z+1/2' 
 'x+1/2, y+1/2, z' 
 '-x+1/2, y+1/2, -z+1/2' 
 '-x, -y, -z' 
 'x, -y, z-1/2' 
 '-x+1/2, -y+1/2, -z' 
 'x+1/2, -y+1/2, z-1/2' 
 
_cell_length_a                    19.974(5) 
_cell_length_b                    9.9000(10) 
_cell_length_c                    22.472(5) 
_cell_angle_alpha                 90.00 
_cell_angle_beta                  122.375(9) 
_cell_angle_gamma                 90.00 
_cell_volume                      3753.0(13) 
_cell_formula_units_Z             8 
_cell_measurement_temperature     183(2) 
_cell_measurement_reflns_used     ? 
_cell_measurement_theta_min       ? 
_cell_measurement_theta_max       ? 
 
_exptl_crystal_description        ? 
_exptl_crystal_colour             ? 
_exptl_crystal_size_max           ? 
_exptl_crystal_size_mid           ? 
_exptl_crystal_size_min           ? 
_exptl_crystal_density_meas       ? 
_exptl_crystal_density_diffrn     1.160 
_exptl_crystal_density_method     'not measured' 
_exptl_crystal_F_000              1432 
_exptl_absorpt_coefficient_mu     0.322 
_exptl_absorpt_correction_type    ? 
_exptl_absorpt_correction_T_min   ? 
_exptl_absorpt_correction_T_max   ? 
 
_exptl_special_details 
; 
 ? 
; 
 
_diffrn_ambient_temperature       183(2) 
_diffrn_radiation_wavelength      0.71073 
_diffrn_radiation_type            MoK\a 
_diffrn_radiation_source          'fine-focus sealed tube' 
_diffrn_radiation_monochromator   graphite 
_diffrn_measurement_device_type   ? 
_diffrn_measurement_method        ? 
_diffrn_detector_area_resol_mean  ? 
_diffrn_standards_number          ? 
_diffrn_standards_interval_count  ? 
_diffrn_standards_interval_time   ? 
_diffrn_standards_decay_%         ? 
_diffrn_reflns_number             4401 
_diffrn_reflns_av_R_equivalents   0.0214 
_diffrn_reflns_av_sigmaI/netI     0.0472 
_diffrn_reflns_limit_h_min        0 
_diffrn_reflns_limit_h_max        25 
_diffrn_reflns_limit_k_min        0 
_diffrn_reflns_limit_k_max        12 
_diffrn_reflns_limit_l_min        -28 
_diffrn_reflns_limit_l_max        24 
_diffrn_reflns_theta_min          2.15 
_diffrn_reflns_theta_max          27.01 
_reflns_number_total              4095 
_reflns_number_gt                 2963 
_reflns_threshold_expression      >2sigma(I) 
 
_computing_data_collection        ? 
_computing_cell_refinement        ? 
_computing_data_reduction         ? 
_computing_structure_solution     'DIRDIF' 
_computing_structure_refinement   'SHELXL-97 (Sheldrick, 1997)' 
_computing_molecular_graphics     ? 
_computing_publication_material   ? 
 
_refine_special_details 
; 
 Refinement of F^2^ against ALL reflections.  The weighted R-factor wR and 
 goodness of fit S are based on F^2^, conventional R-factors R are based 
 on F, with F set to zero for negative F^2^. The threshold expression of 
 F^2^ > 2sigma(F^2^) is used only for calculating R-factors(gt) etc. and is 
 not relevant to the choice of reflections for refinement.  R-factors based 
 on F^2^ are statistically about twice as large as those based on F, and R- 
 factors based on ALL data will be even larger. 
; 
 
_refine_ls_structure_factor_coef  Fsqd  
_refine_ls_matrix_type            full 
_refine_ls_weighting_scheme 
 'calc w=1/[\s^2^(Fo^2^)+(0.0631P)^2^+1.9436P] where P=(Fo^2^+2Fc^2^)/3' 
_atom_sites_solution_primary      direct 
_atom_sites_solution_secondary    difmap 
_atom_sites_solution_hydrogens    geom 
_refine_ls_hydrogen_treatment     mixed 
_refine_ls_extinction_method      none 
_refine_ls_extinction_coef        ? 
_refine_ls_number_reflns          4095 
_refine_ls_number_parameters      310 
_refine_ls_number_restraints      0 
_refine_ls_R_factor_all           0.0803 
_refine_ls_R_factor_gt            0.0421 
_refine_ls_wR_factor_ref          0.1136 
_refine_ls_wR_factor_gt           0.1003 
_refine_ls_goodness_of_fit_ref    1.004 
_refine_ls_restrained_S_all       1.004 
_refine_ls_shift/su_max           0.019 
_refine_ls_shift/su_mean          0.001 
 
loop_ 
 _atom_site_label 
 _atom_site_type_symbol 
 _atom_site_fract_x 
 _atom_site_fract_y 
 _atom_site_fract_z 
 _atom_site_U_iso_or_equiv 
 _atom_site_adp_type 
 _atom_site_occupancy 
 _atom_site_calc_flag 
 _atom_site_refinement_flags 
 _atom_site_disorder_assembly 
 _atom_site_disorder_group 
Ca Ca 0.5000 0.11829(6) 0.2500 0.02456(16) Uani 1 d S . . 
Si1 Si 0.71484(4) 0.17879(7) 0.32479(3) 0.02933(17) Uani 1 d . . . 
Si2 Si 0.68585(4) -0.10472(6) 0.36303(3) 0.02857(16) Uani 1 d . . . 
C1 C 0.61101(12) -0.0098(2) 0.22255(11) 0.0245(4) Uani 1 d . . . 
C2 C 0.54609(13) -0.1002(2) 0.18896(12) 0.0282(5) Uani 1 d . . . 
C3 C 0.51220(15) -0.1423(2) 0.11941(13) 0.0340(5) Uani 1 d . . . 
C4 C 0.53954(16) -0.0943(3) 0.07921(13) 0.0377(6) Uani 1 d . . . 
C5 C 0.60159(15) -0.0032(3) 0.10862(13) 0.0356(5) Uani 1 d . . . 
C6 C 0.63641(14) 0.0379(2) 0.17797(12) 0.0313(5) Uani 1 d . . . 
C7 C 0.64577(12) 0.0330(2) 0.29675(11) 0.0248(4) Uani 1 d . . . 
C8 C 0.75249(19) 0.2341(3) 0.41688(15) 0.0432(6) Uani 1 d . . . 
C9 C 0.80705(17) 0.1526(3) 0.32252(18) 0.0443(7) Uani 1 d . . . 
C10 C 0.66595(18) 0.3331(3) 0.26990(16) 0.0412(6) Uani 1 d . . . 
C11 C 0.63571(17) -0.2735(3) 0.33208(15) 0.0382(6) Uani 1 d . . . 
C12 C 0.79219(17) -0.1476(3) 0.39550(17) 0.0453(7) Uani 1 d . . . 
C13 C 0.68808(17) -0.0653(3) 0.44597(13) 0.0373(6) Uani 1 d . . . 
O O 0.53042(10) 0.27623(16) 0.34108(8) 0.0335(4) Uani 1 d . . . 
C14 C 0.54482(16) 0.2289(3) 0.40780(13) 0.0364(6) Uani 1 d . . . 
C15 C 0.51710(18) 0.3403(3) 0.43447(16) 0.0435(6) Uani 1 d . . . 
C16 C 0.5326(3) 0.4651(3) 0.4057(2) 0.0626(10) Uani 1 d . . . 
C17 C 0.5428(3) 0.4210(3) 0.3484(2) 0.0525(8) Uani 1 d . . . 
H2 H 0.5262(13) -0.138(2) 0.2160(12) 0.024(6) Uiso 1 d . . . 
H3 H 0.4709(16) -0.202(3) 0.1008(14) 0.039(7) Uiso 1 d . . . 
H4 H 0.5163(17) -0.116(3) 0.0312(15) 0.050(8) Uiso 1 d . . . 
H5 H 0.6239(16) 0.030(3) 0.0846(14) 0.047(8) Uiso 1 d . . . 
H6 H 0.6794(15) 0.098(3) 0.1959(13) 0.036(7) Uiso 1 d . . . 
H81 H 0.7087(19) 0.250(3) 0.4235(16) 0.063(10) Uiso 1 d . . . 
H82 H 0.7882(19) 0.174(4) 0.4499(17) 0.057(9) Uiso 1 d . . . 
H83 H 0.783(2) 0.313(4) 0.4264(17) 0.070(10) Uiso 1 d . . . 
H91 H 0.806(2) 0.077(4) 0.2984(19) 0.076(11) Uiso 1 d . . . 
H92 H 0.847(2) 0.133(4) 0.366(2) 0.095(14) Uiso 1 d . . . 
H93 H 0.820(3) 0.227(5) 0.309(2) 0.122(17) Uiso 1 d . . . 
H101 H 0.703(2) 0.402(4) 0.2854(19) 0.082(12) Uiso 1 d . . . 
H102 H 0.623(2) 0.364(4) 0.2772(17) 0.072(11) Uiso 1 d . . . 
H103 H 0.6402(18) 0.316(3) 0.2207(17) 0.060(9) Uiso 1 d . . . 
H111 H 0.6356(17) -0.303(3) 0.2939(16) 0.047(8) Uiso 1 d . . . 
H112 H 0.6660(17) -0.329(3) 0.3708(15) 0.047(8) Uiso 1 d . . . 
H113 H 0.5830(18) -0.278(3) 0.3234(14) 0.047(8) Uiso 1 d . . . 
H121 H 0.8258(19) -0.069(4) 0.4173(16) 0.063(10) Uiso 1 d . . . 
H122 H 0.7968(19) -0.164(3) 0.3591(18) 0.061(10) Uiso 1 d . . . 
H123 H 0.810(2) -0.226(4) 0.4284(17) 0.072(10) Uiso 1 d . . . 
H131 H 0.6365(18) -0.035(3) 0.4365(14) 0.050(8) Uiso 1 d . . . 
H132 H 0.729(2) -0.006(4) 0.4744(16) 0.066(10) Uiso 1 d . . . 
H133 H 0.6998(19) -0.140(4) 0.4739(17) 0.064(10) Uiso 1 d . . . 
H141 H 0.5178(15) 0.148(3) 0.4004(13) 0.035(7) Uiso 1 d . . . 
H142 H 0.5979(18) 0.212(3) 0.4363(15) 0.050(8) Uiso 1 d . . . 
H151 H 0.460(2) 0.334(3) 0.4117(17) 0.065(10) Uiso 1 d . . . 
H152 H 0.5418(17) 0.340(3) 0.4818(16) 0.051(8) Uiso 1 d . . . 
H161 H -0.005(3) 0.021(5) 0.105(2) 0.107(18) Uiso 1 d . . . 
H162 H 0.572(2) 0.510(5) 0.435(2) 0.080(13) Uiso 1 d . . . 
H171 H 0.505(2) 0.457(4) 0.3084(19) 0.071(12) Uiso 1 d . . . 
H172 H 0.589(2) 0.443(4) 0.358(2) 0.086(13) Uiso 1 d . . . 
 
loop_ 
 _atom_site_aniso_label 
 _atom_site_aniso_U_11 
 _atom_site_aniso_U_22 
 _atom_site_aniso_U_33 
 _atom_site_aniso_U_23 
 _atom_site_aniso_U_13 
 _atom_site_aniso_U_12 
Ca 0.0247(3) 0.0210(3) 0.0265(3) 0.000 0.0127(3) 0.000 
Si1 0.0296(3) 0.0298(3) 0.0291(3) -0.0057(3) 0.0160(3) -0.0078(3) 
Si2 0.0287(3) 0.0283(3) 0.0285(3) 0.0036(3) 0.0152(3) 0.0036(3) 
C1 0.0239(10) 0.0213(10) 0.0267(11) 0.0015(8) 0.0126(9) 0.0042(8) 
C2 0.0280(11) 0.0243(11) 0.0295(11) -0.0008(9) 0.0135(10) 0.0010(9) 
C3 0.0311(12) 0.0272(12) 0.0332(12) -0.0059(10) 0.0103(10) 0.0014(10) 
C4 0.0445(14) 0.0357(13) 0.0256(12) -0.0014(10) 0.0139(11) 0.0126(11) 
C5 0.0435(14) 0.0359(13) 0.0309(12) 0.0051(10) 0.0223(11) 0.0077(11) 
C6 0.0312(12) 0.0316(12) 0.0324(12) 0.0008(10) 0.0180(10) 0.0008(10) 
C7 0.0258(10) 0.0235(11) 0.0235(10) -0.0002(9) 0.0120(9) -0.0028(9) 
C8 0.0439(16) 0.0475(17) 0.0357(14) -0.0139(13) 0.0197(13) -0.0147(14) 
C9 0.0372(15) 0.0490(17) 0.0525(17) -0.0140(15) 0.0278(14) -0.0146(13) 
C10 0.0481(16) 0.0299(13) 0.0477(16) -0.0003(12) 0.0271(14) -0.0083(12) 
C11 0.0463(16) 0.0263(12) 0.0414(15) 0.0065(11) 0.0231(13) 0.0060(11) 
C12 0.0373(15) 0.0519(18) 0.0481(17) 0.0123(15) 0.0238(13) 0.0125(13) 
C13 0.0410(15) 0.0405(14) 0.0295(12) 0.0046(11) 0.0182(12) 0.0024(12) 
O 0.0411(9) 0.0247(8) 0.0369(9) -0.0072(7) 0.0223(8) -0.0071(7) 
C14 0.0380(14) 0.0314(13) 0.0359(13) -0.0015(10) 0.0171(12) -0.0067(11) 
C15 0.0464(16) 0.0476(16) 0.0387(15) -0.0032(13) 0.0243(13) 0.0022(13) 
C16 0.110(3) 0.0283(16) 0.060(2) -0.0070(15) 0.053(2) 0.0026(19) 
C17 0.084(2) 0.0274(14) 0.057(2) -0.0100(13) 0.045(2) -0.0182(15) 
 
_geom_special_details 
; 
 All esds (except the esd in the dihedral angle between two l.s. planes) 
 are estimated using the full covariance matrix.  The cell esds are taken 
 into account individually in the estimation of esds in distances, angles 
 and torsion angles; correlations between esds in cell parameters are only 
 used when they are defined by crystal symmetry.  An approximate (isotropic) 
 treatment of cell esds is used for estimating esds involving l.s. planes. 
; 
 
loop_ 
 _geom_bond_atom_site_label_1 
 _geom_bond_atom_site_label_2 
 _geom_bond_distance 
 _geom_bond_site_symmetry_2 
 _geom_bond_publ_flag 
Ca O 2.3815(16) 2_655 ? 
Ca O 2.3815(16) . ? 
Ca C7 2.649(2) 2_655 ? 
Ca C7 2.649(2) . ? 
Ca C1 2.893(2) 2_655 ? 
Ca C1 2.893(2) . ? 
Ca C2 2.959(2) 2_655 ? 
Ca C2 2.960(2) . ? 
Si1 C7 1.858(2) . ? 
Si1 C8 1.866(3) . ? 
Si1 C10 1.876(3) . ? 
Si1 C9 1.887(3) . ? 
Si2 C7 1.855(2) . ? 
Si2 C11 1.879(3) . ? 
Si2 C13 1.881(3) . ? 
Si2 C12 1.888(3) . ? 
C1 C2 1.416(3) . ? 
C1 C6 1.424(3) . ? 
C1 C7 1.484(3) . ? 
C2 C3 1.394(3) . ? 
C3 C4 1.367(4) . ? 
C4 C5 1.382(4) . ? 
C5 C6 1.385(3) . ? 
O C14 1.445(3) . ? 
O C17 1.448(3) . ? 
C14 C15 1.496(4) . ? 
C15 C16 1.501(5) . ? 
C16 C17 1.474(5) . ? 
 
loop_ 
 _geom_angle_atom_site_label_1 
 _geom_angle_atom_site_label_2 
 _geom_angle_atom_site_label_3 
 _geom_angle 
 _geom_angle_site_symmetry_1 
 _geom_angle_site_symmetry_3 
 _geom_angle_publ_flag 
O Ca O 97.92(8) 2_655 . ? 
O Ca C7 98.51(6) 2_655 2_655 ? 
O Ca C7 105.69(6) . 2_655 ? 
O Ca C7 105.69(6) 2_655 . ? 
O Ca C7 98.51(6) . . ? 
C7 Ca C7 142.84(9) 2_655 . ? 
O Ca C1 126.80(6) 2_655 2_655 ? 
O Ca C1 88.65(6) . 2_655 ? 
C7 Ca C1 30.66(6) 2_655 2_655 ? 
C7 Ca C1 125.52(6) . 2_655 ? 
O Ca C1 88.65(6) 2_655 . ? 
O Ca C1 126.80(6) . . ? 
C7 Ca C1 125.52(6) 2_655 . ? 
C7 Ca C1 30.66(6) . . ? 
C1 Ca C1 128.02(9) 2_655 . ? 
O Ca C2 151.48(6) 2_655 2_655 ? 
O Ca C2 94.65(6) . 2_655 ? 
C7 Ca C2 53.30(6) 2_655 2_655 ? 
C7 Ca C2 97.58(6) . 2_655 ? 
C1 Ca C2 27.97(6) 2_655 2_655 ? 
C1 Ca C2 104.05(7) . 2_655 ? 
O Ca C2 94.65(6) 2_655 . ? 
O Ca C2 151.47(6) . . ? 
C7 Ca C2 97.58(7) 2_655 . ? 
C7 Ca C2 53.30(6) . . ? 
C1 Ca C2 104.05(7) 2_655 . ? 
C1 Ca C2 27.97(6) . . ? 
C2 Ca C2 86.10(9) 2_655 . ? 
C7 Si1 C8 112.90(12) . . ? 
C7 Si1 C10 112.26(12) . . ? 
C8 Si1 C10 104.43(15) . . ? 
C7 Si1 C9 116.23(12) . . ? 
C8 Si1 C9 104.52(14) . . ? 
C10 Si1 C9 105.44(15) . . ? 
C7 Si2 C11 116.16(11) . . ? 
C7 Si2 C13 114.47(11) . . ? 
C11 Si2 C13 106.04(13) . . ? 
C7 Si2 C12 112.84(12) . . ? 
C11 Si2 C12 102.07(14) . . ? 
C13 Si2 C12 103.82(14) . . ? 
C2 C1 C6 113.82(19) . . ? 
C2 C1 C7 121.58(19) . . ? 
C6 C1 C7 124.56(19) . . ? 
C2 C1 Ca 78.64(12) . . ? 
C6 C1 Ca 127.39(15) . . ? 
C7 C1 Ca 65.56(11) . . ? 
C3 C2 C1 122.9(2) . . ? 
C3 C2 Ca 130.83(15) . . ? 
C1 C2 Ca 73.40(12) . . ? 
C4 C3 C2 120.7(2) . . ? 
C3 C4 C5 119.0(2) . . ? 
C4 C5 C6 120.7(2) . . ? 
C5 C6 C1 122.8(2) . . ? 
C1 C7 Si2 115.69(15) . . ? 
C1 C7 Si1 114.75(15) . . ? 
Si2 C7 Si1 112.07(11) . . ? 
C1 C7 Ca 83.78(12) . . ? 
Si2 C7 Ca 117.56(10) . . ? 
Si1 C7 Ca 110.23(10) . . ? 
C14 O C17 106.0(2) . . ? 
C14 O Ca 119.74(14) . . ? 
C17 O Ca 134.17(16) . . ? 
O C14 C15 105.4(2) . . ? 
C14 C15 C16 103.2(2) . . ? 
C17 C16 C15 106.8(3) . . ? 
O C17 C16 107.3(2) . . ? 
 
loop_ 
 _geom_torsion_atom_site_label_1 
 _geom_torsion_atom_site_label_2 
 _geom_torsion_atom_site_label_3 
 _geom_torsion_atom_site_label_4 
 _geom_torsion 
 _geom_torsion_site_symmetry_1 
 _geom_torsion_site_symmetry_2 
 _geom_torsion_site_symmetry_3 
 _geom_torsion_site_symmetry_4 
 _geom_torsion_publ_flag 
O Ca C1 C2 -102.54(13) 2_655 . . . ? 
O Ca C1 C2 158.57(12) . . . . ? 
C7 Ca C1 C2 -3.04(15) 2_655 . . . ? 
C7 Ca C1 C2 132.69(19) . . . . ? 
C1 Ca C1 C2 35.38(11) 2_655 . . . ? 
C2 Ca C1 C2 51.63(16) 2_655 . . . ? 
O Ca C1 C6 8.87(19) 2_655 . . . ? 
O Ca C1 C6 -90.02(19) . . . . ? 
C7 Ca C1 C6 108.37(19) 2_655 . . . ? 
C7 Ca C1 C6 -115.9(2) . . . . ? 
C1 Ca C1 C6 146.8(2) 2_655 . . . ? 
C2 Ca C1 C6 163.03(18) 2_655 . . . ? 
C2 Ca C1 C6 111.4(2) . . . . ? 
O Ca C1 C7 124.77(12) 2_655 . . . ? 
O Ca C1 C7 25.89(14) . . . . ? 
C7 Ca C1 C7 -135.73(13) 2_655 . . . ? 
C1 Ca C1 C7 -97.31(12) 2_655 . . . ? 
C2 Ca C1 C7 -81.06(12) 2_655 . . . ? 
C2 Ca C1 C7 -132.69(19) . . . . ? 
C6 C1 C2 C3 2.3(3) . . . . ? 
C7 C1 C2 C3 -179.9(2) . . . . ? 
Ca C1 C2 C3 128.3(2) . . . . ? 
C6 C1 C2 Ca -126.04(18) . . . . ? 
C7 C1 C2 Ca 51.77(17) . . . . ? 
O Ca C2 C3 -41.2(2) 2_655 . . . ? 
O Ca C2 C3 -157.26(19) . . . . ? 
C7 Ca C2 C3 58.0(2) 2_655 . . . ? 
C7 Ca C2 C3 -147.4(3) . . . . ? 
C1 Ca C2 C3 88.6(2) 2_655 . . . ? 
C1 Ca C2 C3 -119.5(3) . . . . ? 
C2 Ca C2 C3 110.2(2) 2_655 . . . ? 
O Ca C2 C1 78.26(13) 2_655 . . . ? 
O Ca C2 C1 -37.8(2) . . . . ? 
C7 Ca C2 C1 177.50(12) 2_655 . . . ? 
C7 Ca C2 C1 -27.87(12) . . . . ? 
C1 Ca C2 C1 -151.96(10) 2_655 . . . ? 
C2 Ca C2 C1 -130.33(14) 2_655 . . . ? 
C1 C2 C3 C4 -1.8(4) . . . . ? 
Ca C2 C3 C4 94.5(3) . . . . ? 
C2 C3 C4 C5 0.1(4) . . . . ? 
C3 C4 C5 C6 0.8(4) . . . . ? 
C4 C5 C6 C1 -0.2(4) . . . . ? 
C2 C1 C6 C5 -1.3(3) . . . . ? 
C7 C1 C6 C5 -179.0(2) . . . . ? 
Ca C1 C6 C5 -95.1(3) . . . . ? 
C2 C1 C7 Si2 59.9(2) . . . . ? 
C6 C1 C7 Si2 -122.6(2) . . . . ? 
Ca C1 C7 Si2 117.65(14) . . . . ? 
C2 C1 C7 Si1 -167.21(16) . . . . ? 
C6 C1 C7 Si1 10.4(3) . . . . ? 
Ca C1 C7 Si1 -109.44(14) . . . . ? 
C2 C1 C7 Ca -57.77(19) . . . . ? 
C6 C1 C7 Ca 119.8(2) . . . . ? 
C11 Si2 C7 C1 -30.5(2) . . . . ? 
C13 Si2 C7 C1 -154.69(17) . . . . ? 
C12 Si2 C7 C1 86.86(19) . . . . ? 
C11 Si2 C7 Si1 -164.65(13) . . . . ? 
C13 Si2 C7 Si1 71.17(15) . . . . ? 
C12 Si2 C7 Si1 -47.28(17) . . . . ? 
C11 Si2 C7 Ca 66.12(15) . . . . ? 
C13 Si2 C7 Ca -58.06(15) . . . . ? 
C12 Si2 C7 Ca -176.51(13) . . . . ? 
C8 Si1 C7 C1 176.90(17) . . . . ? 
C10 Si1 C7 C1 59.17(19) . . . . ? 
C9 Si1 C7 C1 -62.3(2) . . . . ? 
C8 Si1 C7 Si2 -48.51(17) . . . . ? 
C10 Si1 C7 Si2 -166.24(13) . . . . ? 
C9 Si1 C7 Si2 72.26(17) . . . . ? 
C8 Si1 C7 Ca 84.45(14) . . . . ? 
C10 Si1 C7 Ca -33.28(14) . . . . ? 
C9 Si1 C7 Ca -154.78(13) . . . . ? 
O Ca C7 C1 -58.54(13) 2_655 . . . ? 
O Ca C7 C1 -159.30(12) . . . . ? 
C7 Ca C7 C1 70.15(11) 2_655 . . . ? 
C1 Ca C7 C1 106.26(14) 2_655 . . . ? 
C2 Ca C7 C1 104.82(12) 2_655 . . . ? 
C2 Ca C7 C1 25.46(11) . . . . ? 
O Ca C7 Si2 -174.33(10) 2_655 . . . ? 
O Ca C7 Si2 84.91(11) . . . . ? 
C7 Ca C7 Si2 -45.64(9) 2_655 . . . ? 
C1 Ca C7 Si2 -9.53(14) 2_655 . . . ? 
C1 Ca C7 Si2 -115.79(17) . . . . ? 
C2 Ca C7 Si2 -10.97(11) 2_655 . . . ? 
C2 Ca C7 Si2 -90.32(12) . . . . ? 
O Ca C7 Si1 55.58(10) 2_655 . . . ? 
O Ca C7 Si1 -45.18(10) . . . . ? 
C7 Ca C7 Si1 -175.73(10) 2_655 . . . ? 
C1 Ca C7 Si1 -139.63(9) 2_655 . . . ? 
C1 Ca C7 Si1 114.12(16) . . . . ? 
C2 Ca C7 Si1 -141.07(9) 2_655 . . . ? 
C2 Ca C7 Si1 139.58(13) . . . . ? 
O Ca O C14 173.06(18) 2_655 . . . ? 
C7 Ca O C14 71.86(17) 2_655 . . . ? 
C7 Ca O C14 -79.67(16) . . . . ? 
C1 Ca O C14 46.07(16) 2_655 . . . ? 
C1 Ca O C14 -92.67(17) . . . . ? 
C2 Ca O C14 18.73(17) 2_655 . . . ? 
C2 Ca O C14 -71.7(2) . . . . ? 
O Ca O C17 -10.6(3) 2_655 . . . ? 
C7 Ca O C17 -111.8(3) 2_655 . . . ? 
C7 Ca O C17 96.6(3) . . . . ? 
C1 Ca O C17 -137.6(3) 2_655 . . . ? 
C1 Ca O C17 83.6(3) . . . . ? 
C2 Ca O C17 -165.0(3) 2_655 . . . ? 
C2 Ca O C17 104.7(3) . . . . ? 
C17 O C14 C15 33.7(3) . . . . ? 
Ca O C14 C15 -149.04(17) . . . . ? 
O C14 C15 C16 -31.3(3) . . . . ? 
C14 C15 C16 C17 17.5(4) . . . . ? 
C14 O C17 C16 -22.4(4) . . . . ? 
Ca O C17 C16 160.9(3) . . . . ? 
C15 C16 C17 O 2.5(5) . . . . ? 
 
_diffrn_measured_fraction_theta_max    0.471 
_diffrn_reflns_theta_full              27.01 
_diffrn_measured_fraction_theta_full   0.471 
_refine_diff_density_max    0.350 
_refine_diff_density_min   -0.247 
_refine_diff_density_rms    0.060 

#===END

data_k240 
 
_audit_creation_method            SHELXL-97 
_chemical_name_systematic 
; 
 ? 
; 
_chemical_name_common             (bis(TMS)benzyl)potassium  
_chemical_formula_moiety          ? 
_chemical_formula_sum 
 'C13 H23 K Si2' 
_chemical_formula_weight          274.59 
 
loop_ 
 _atom_type_symbol 
 _atom_type_description 
 _atom_type_scat_dispersion_real 
 _atom_type_scat_dispersion_imag 
 _atom_type_scat_source 
 'C'  'C'   0.0033   0.0016 
 'International Tables Vol C Tables 4.2.6.8 and 6.1.1.4' 
 'H'  'H'   0.0000   0.0000 
 'International Tables Vol C Tables 4.2.6.8 and 6.1.1.4' 
 'Si'  'Si'   0.0817   0.0704 
 'International Tables Vol C Tables 4.2.6.8 and 6.1.1.4' 
 'K'  'K'   0.2009   0.2494 
 'International Tables Vol C Tables 4.2.6.8 and 6.1.1.4' 
 
_symmetry_cell_setting            ? 
_symmetry_space_group_name_H-M    ? 
 
loop_ 
 _symmetry_equiv_pos_as_xyz 
 'x, y, z' 
 '-x+1/2, -y, z+1/2' 
 '-x, y+1/2, -z+1/2' 
 'x+1/2, -y+1/2, -z' 
 
_cell_length_a                    6.5946(6) 
_cell_length_b                    13.3880(10) 
_cell_length_c                    17.544(2) 
_cell_angle_alpha                 90.00 
_cell_angle_beta                  90.00 
_cell_angle_gamma                 90.00 
_cell_volume                      1548.9(3) 
_cell_formula_units_Z             4 
_cell_measurement_temperature     183(2) 
_cell_measurement_reflns_used     ? 
_cell_measurement_theta_min       ? 
_cell_measurement_theta_max       ? 
 
_exptl_crystal_description        ? 
_exptl_crystal_colour             ? 
_exptl_crystal_size_max           ? 
_exptl_crystal_size_mid           ? 
_exptl_crystal_size_min           ? 
_exptl_crystal_density_meas       ? 
_exptl_crystal_density_diffrn     1.178 
_exptl_crystal_density_method     'not measured' 
_exptl_crystal_F_000              592 
_exptl_absorpt_coefficient_mu     0.474 
_exptl_absorpt_correction_type    ? 
_exptl_absorpt_correction_T_min   ? 
_exptl_absorpt_correction_T_max   ? 
 
_exptl_special_details 
; 
 ? 
; 
 
_diffrn_ambient_temperature       183(2) 
_diffrn_radiation_wavelength      0.71073 
_diffrn_radiation_type            MoK\a 
_diffrn_radiation_source          'fine-focus sealed tube' 
_diffrn_radiation_monochromator   graphite 
_diffrn_measurement_device_type   ? 
_diffrn_measurement_method        ? 
_diffrn_detector_area_resol_mean  ? 
_diffrn_standards_number          ? 
_diffrn_standards_interval_count  ? 
_diffrn_standards_interval_time   ? 
_diffrn_standards_decay_%         ? 
_diffrn_reflns_number             4306 
_diffrn_reflns_av_R_equivalents   0.0192 
_diffrn_reflns_av_sigmaI/netI     0.0426 
_diffrn_reflns_limit_h_min        -8 
_diffrn_reflns_limit_h_max        8 
_diffrn_reflns_limit_k_min        -17 
_diffrn_reflns_limit_k_max        17 
_diffrn_reflns_limit_l_min        -23 
_diffrn_reflns_limit_l_max        23 
_diffrn_reflns_theta_min          1.91 
_diffrn_reflns_theta_max          27.97 
_reflns_number_total              3731 
_reflns_number_gt                 3129 
_reflns_threshold_expression      >2sigma(I) 
 
_computing_data_collection        ? 
_computing_cell_refinement        ? 
_computing_data_reduction         ? 
_computing_structure_solution     'DIRDIF' 
_computing_structure_refinement   'SHELXL-97 (Sheldrick, 1997)' 
_computing_molecular_graphics     ? 
_computing_publication_material   ? 
 
_refine_special_details 
; 
 Refinement of F^2^ against ALL reflections.  The weighted R-factor wR and 
 goodness of fit S are based on F^2^, conventional R-factors R are based 
 on F, with F set to zero for negative F^2^. The threshold expression of 
 F^2^ > 2sigma(F^2^) is used only for calculating R-factors(gt) etc. and is 
 not relevant to the choice of reflections for refinement.  R-factors based 
 on F^2^ are statistically about twice as large as those based on F, and R- 
 factors based on ALL data will be even larger. 
; 
 
_refine_ls_structure_factor_coef  Fsqd  
_refine_ls_matrix_type            full 
_refine_ls_weighting_scheme 
 'calc w=1/[\s^2^(Fo^2^)+(0.0386P)^2^+0.0475P] where P=(Fo^2^+2Fc^2^)/3' 
_atom_sites_solution_primary      direct 
_atom_sites_solution_secondary    difmap 
_atom_sites_solution_hydrogens    geom 
_refine_ls_hydrogen_treatment     mixed 
_refine_ls_extinction_method      none 
_refine_ls_extinction_coef        ? 
_refine_ls_abs_structure_details 
 'Flack H D (1983), Acta Cryst. A39, 876-881' 
_refine_ls_abs_structure_Flack    -0.07(5) 
_refine_ls_number_reflns          3731 
_refine_ls_number_parameters      237 
_refine_ls_number_restraints      0 
_refine_ls_R_factor_all           0.0566 
_refine_ls_R_factor_gt            0.0337 
_refine_ls_wR_factor_ref          0.0758 
_refine_ls_wR_factor_gt           0.0696 
_refine_ls_goodness_of_fit_ref    1.056 
_refine_ls_restrained_S_all       1.056 
_refine_ls_shift/su_max           0.001 
_refine_ls_shift/su_mean          0.000 
 
loop_ 
 _atom_site_label 
 _atom_site_type_symbol 
 _atom_site_fract_x 
 _atom_site_fract_y 
 _atom_site_fract_z 
 _atom_site_U_iso_or_equiv 
 _atom_site_adp_type 
 _atom_site_occupancy 
 _atom_site_calc_flag 
 _atom_site_refinement_flags 
 _atom_site_disorder_assembly 
 _atom_site_disorder_group 
K K 0.26559(8) 0.13705(4) 0.63675(3) 0.04111(15) Uani 1 d . . . 
Si1 Si 0.68258(8) -0.00558(5) 0.75395(3) 0.02515(13) Uani 1 d . . . 
Si2 Si 0.52420(9) -0.09368(4) 0.59565(3) 0.02553(13) Uani 1 d . . . 
C1 C 0.7452(3) 0.08667(15) 0.61298(10) 0.0223(4) Uani 1 d . . . 
C2 C 0.7625(3) 0.18548(15) 0.64287(12) 0.0279(4) Uani 1 d . . . 
C3 C 0.8614(3) 0.26226(17) 0.60488(16) 0.0325(5) Uani 1 d . . . 
C4 C 0.9533(4) 0.24603(19) 0.53490(15) 0.0352(5) Uani 1 d . . . 
C5 C 0.9433(3) 0.15109(19) 0.50418(13) 0.0322(5) Uani 1 d . . . 
C6 C 0.8446(3) 0.07434(17) 0.54111(12) 0.0264(5) Uani 1 d . . . 
C7 C 0.6364(3) 0.00783(15) 0.65169(11) 0.0231(4) Uani 1 d . . . 
C8 C 0.6959(5) -0.1409(2) 0.78416(17) 0.0436(6) Uani 1 d . . . 
C9 C 0.9398(4) 0.0441(3) 0.78136(16) 0.0426(6) Uani 1 d . . . 
C10 C 0.5001(5) 0.0544(3) 0.82177(17) 0.0488(7) Uani 1 d . . . 
C11 C 0.2992(4) -0.1503(2) 0.64603(18) 0.0451(7) Uani 1 d . . . 
C12 C 0.6968(5) -0.1995(2) 0.56839(18) 0.0448(7) Uani 1 d . . . 
C13 C 0.4133(5) -0.0452(2) 0.50350(15) 0.0408(6) Uani 1 d . . . 
H2 H 0.705(4) 0.1962(16) 0.6923(13) 0.021(5) Uiso 1 d . . . 
H3 H 0.855(4) 0.3223(19) 0.6264(13) 0.030(6) Uiso 1 d . . . 
H4 H 0.015(5) 0.294(2) 0.5125(15) 0.046(8) Uiso 1 d . . . 
H5 H 0.999(4) 0.1354(18) 0.4592(13) 0.028(6) Uiso 1 d . . . 
H6 H 0.845(3) 0.0116(18) 0.5154(12) 0.023(5) Uiso 1 d . . . 
H81 H 0.261(5) 0.357(2) 0.6675(17) 0.050(8) Uiso 1 d . . . 
H82 H 0.210(6) 0.321(3) 0.746(2) 0.083(12) Uiso 1 d . . . 
H83 H 0.420(6) 0.331(3) 0.720(2) 0.075(12) Uiso 1 d . . . 
H91 H 0.973(5) 0.027(2) 0.8359(17) 0.059(9) Uiso 1 d . . . 
H92 H 0.045(6) 0.010(2) 0.7504(18) 0.067(9) Uiso 1 d . . . 
H93 H -0.053(5) 0.112(2) 0.7747(16) 0.053(9) Uiso 1 d . . . 
H101 H 0.484(5) 0.123(3) 0.8140(17) 0.057(10) Uiso 1 d . . . 
H102 H 0.373(6) 0.027(3) 0.818(2) 0.072(11) Uiso 1 d . . . 
H103 H 0.539(5) 0.047(2) 0.8708(18) 0.060(9) Uiso 1 d . . . 
H111 H 0.259(6) -0.210(3) 0.6218(19) 0.073(10) Uiso 1 d . . . 
H112 H 0.328(6) -0.163(3) 0.699(2) 0.084(12) Uiso 1 d . . . 
H113 H 0.195(9) -0.104(4) 0.648(3) 0.15(2) Uiso 1 d . . . 
H121 H 0.747(5) -0.230(2) 0.615(2) 0.063(10) Uiso 1 d . . . 
H122 H 0.824(6) -0.178(2) 0.5400(18) 0.061(9) Uiso 1 d . . . 
H123 H 0.634(6) -0.249(3) 0.539(2) 0.073(11) Uiso 1 d . . . 
H131 H 0.374(5) -0.096(2) 0.4734(18) 0.057(9) Uiso 1 d . . . 
H132 H 0.271(7) -0.016(3) 0.512(2) 0.106(14) Uiso 1 d . . . 
H133 H 0.488(8) 0.000(4) 0.483(2) 0.109(15) Uiso 1 d . . . 
 
loop_ 
 _atom_site_aniso_label 
 _atom_site_aniso_U_11 
 _atom_site_aniso_U_22 
 _atom_site_aniso_U_33 
 _atom_site_aniso_U_23 
 _atom_site_aniso_U_13 
 _atom_site_aniso_U_12 
K 0.0302(3) 0.0397(3) 0.0533(3) -0.0058(3) -0.0087(2) 0.0099(2) 
Si1 0.0207(2) 0.0327(3) 0.0221(2) 0.0017(3) -0.0014(2) 0.0010(2) 
Si2 0.0260(3) 0.0230(3) 0.0277(3) -0.0016(2) -0.0013(2) -0.0009(2) 
C1 0.0180(9) 0.0252(9) 0.0237(9) 0.0004(8) -0.0048(7) 0.0032(8) 
C2 0.0227(10) 0.0298(11) 0.0312(11) -0.0014(9) -0.0022(9) 0.0028(9) 
C3 0.0256(11) 0.0228(10) 0.0491(15) 0.0006(10) -0.0084(10) -0.0009(8) 
C4 0.0212(11) 0.0375(13) 0.0471(14) 0.0170(11) -0.0044(10) -0.0033(10) 
C5 0.0222(10) 0.0449(14) 0.0294(11) 0.0062(10) 0.0010(9) -0.0007(10) 
C6 0.0234(10) 0.0286(11) 0.0272(10) -0.0004(9) -0.0017(8) -0.0011(8) 
C7 0.0242(10) 0.0238(10) 0.0214(9) -0.0019(9) -0.0014(7) 0.0012(8) 
C8 0.0523(18) 0.0415(14) 0.0369(14) 0.0149(12) -0.0087(13) -0.0020(14) 
C9 0.0300(13) 0.0613(19) 0.0366(14) 0.0074(13) -0.0084(11) -0.0059(13) 
C10 0.0375(16) 0.077(2) 0.0322(14) -0.0039(14) 0.0070(12) 0.0111(15) 
C11 0.0386(15) 0.0496(16) 0.0471(16) 0.0008(14) 0.0009(13) -0.0168(13) 
C12 0.0451(17) 0.0315(13) 0.0578(17) -0.0144(12) 0.0012(14) 0.0067(12) 
C13 0.0500(16) 0.0377(14) 0.0348(13) -0.0020(12) -0.0164(12) -0.0076(13) 
 
_geom_special_details 
; 
 All esds (except the esd in the dihedral angle between two l.s. planes) 
 are estimated using the full covariance matrix.  The cell esds are taken 
 into account individually in the estimation of esds in distances, angles 
 and torsion angles; correlations between esds in cell parameters are only 
 used when they are defined by crystal symmetry.  An approximate (isotropic) 
 treatment of cell esds is used for estimating esds involving l.s. planes. 
; 
 
loop_ 
 _geom_bond_atom_site_label_1 
 _geom_bond_atom_site_label_2 
 _geom_bond_distance 
 _geom_bond_site_symmetry_2 
 _geom_bond_publ_flag 
K C7 3.007(2) . ? 
K C4 3.093(2) 1_455 ? 
K C5 3.156(2) 1_455 ? 
K C3 3.198(2) 1_455 ? 
K C1 3.261(2) . ? 
K C8 3.290(3) 3_656 ? 
K C2 3.342(2) . ? 
K C6 3.351(2) 1_455 ? 
K C2 3.382(2) 1_455 ? 
K C13 3.517(3) . ? 
K C1 3.522(2) 1_455 ? 
K Si2 3.6016(8) . ? 
K Si1 3.9289(8) . ? 
Si1 C7 1.829(2) . ? 
Si1 C10 1.873(3) . ? 
Si1 C9 1.884(3) . ? 
Si1 C8 1.890(3) . ? 
Si2 C7 1.833(2) . ? 
Si2 C12 1.879(3) . ? 
Si2 C11 1.886(3) . ? 
Si2 C13 1.890(3) . ? 
C1 C2 1.428(3) . ? 
C1 C6 1.431(3) . ? 
C1 C7 1.446(3) . ? 
C1 K 3.522(2) 1_655 ? 
C2 C3 1.388(3) . ? 
C2 K 3.382(2) 1_655 ? 
C3 C4 1.386(4) . ? 
C3 K 3.198(2) 1_655 ? 
C4 C5 1.382(4) . ? 
C4 K 3.092(2) 1_655 ? 
C5 C6 1.378(3) . ? 
C5 K 3.156(2) 1_655 ? 
C6 K 3.351(2) 1_655 ? 
C8 K 3.290(3) 3_646 ? 
 
loop_ 
 _geom_angle_atom_site_label_1 
 _geom_angle_atom_site_label_2 
 _geom_angle_atom_site_label_3 
 _geom_angle 
 _geom_angle_site_symmetry_1 
 _geom_angle_site_symmetry_3 
 _geom_angle_publ_flag 
C7 K C4 149.70(7) . 1_455 ? 
C7 K C5 130.25(6) . 1_455 ? 
C4 K C5 25.53(7) 1_455 1_455 ? 
C7 K C3 174.07(6) . 1_455 ? 
C4 K C3 25.39(7) 1_455 1_455 ? 
C5 K C3 43.84(7) 1_455 1_455 ? 
C7 K C1 26.27(5) . . ? 
C4 K C1 132.05(6) 1_455 . ? 
C5 K C1 124.84(6) 1_455 . ? 
C3 K C1 153.45(6) 1_455 . ? 
C7 K C8 114.85(7) . 3_656 ? 
C4 K C8 82.47(8) 1_455 3_656 ? 
C5 K C8 108.00(8) 1_455 3_656 ? 
C3 K C8 70.40(7) 1_455 3_656 ? 
C1 K C8 99.55(7) . 3_656 ? 
C7 K C2 46.48(5) . . ? 
C4 K C2 125.45(6) 1_455 . ? 
C5 K C2 132.26(6) 1_455 . ? 
C3 K C2 136.15(6) 1_455 . ? 
C1 K C2 24.93(5) . . ? 
C8 K C2 74.66(7) 3_656 . ? 
C7 K C6 124.98(6) . 1_455 ? 
C4 K C6 43.70(6) 1_455 1_455 ? 
C5 K C6 24.21(6) 1_455 1_455 ? 
C3 K C6 49.70(6) 1_455 1_455 ? 
C1 K C6 133.46(5) . 1_455 ? 
C8 K C6 120.10(7) 3_656 1_455 ? 
C2 K C6 151.29(6) . 1_455 ? 
C7 K C2 154.86(6) . 1_455 ? 
C4 K C2 43.50(6) 1_455 1_455 ? 
C5 K C2 49.56(6) 1_455 1_455 ? 
C3 K C2 24.14(6) 1_455 1_455 ? 
C1 K C2 174.39(5) . 1_455 ? 
C8 K C2 83.64(7) 3_656 1_455 ? 
C2 K C2 157.46(7) . 1_455 ? 
C6 K C2 41.51(5) 1_455 1_455 ? 
C7 K C13 55.49(6) . . ? 
C4 K C13 97.34(7) 1_455 . ? 
C5 K C13 74.81(7) 1_455 . ? 
C3 K C13 118.57(7) 1_455 . ? 
C1 K C13 60.19(6) . . ? 
C8 K C13 152.34(8) 3_656 . ? 
C2 K C13 83.36(7) . . ? 
C6 K C13 73.90(6) 1_455 . ? 
C2 K C13 115.20(6) 1_455 . ? 
C7 K C1 133.83(5) . 1_455 ? 
C4 K C1 51.17(6) 1_455 1_455 ? 
C5 K C1 42.95(5) 1_455 1_455 ? 
C3 K C1 42.91(5) 1_455 1_455 ? 
C1 K C1 152.91(7) . 1_455 ? 
C8 K C1 107.35(7) 3_656 1_455 ? 
C2 K C1 175.04(5) . 1_455 ? 
C6 K C1 23.86(5) 1_455 1_455 ? 
C2 K C1 23.75(5) 1_455 1_455 ? 
C13 K C1 93.34(6) . 1_455 ? 
C7 K Si2 30.56(4) . . ? 
C4 K Si2 127.18(6) 1_455 . ? 
C5 K Si2 102.85(5) 1_455 . ? 
C3 K Si2 144.02(5) 1_455 . ? 
C1 K Si2 48.52(4) . . ? 
C8 K Si2 145.36(6) 3_656 . ? 
C2 K Si2 73.05(4) . . ? 
C6 K Si2 94.43(4) 1_455 . ? 
C2 K Si2 129.44(4) 1_455 . ? 
C13 K Si2 30.76(4) . . ? 
C1 K Si2 105.87(4) 1_455 . ? 
C7 K Si1 26.56(4) . . ? 
C4 K Si1 176.23(6) 1_455 . ? 
C5 K Si1 152.36(5) 1_455 . ? 
C3 K Si1 158.38(5) 1_455 . ? 
C1 K Si1 44.56(3) . . ? 
C8 K Si1 99.46(6) 3_656 . ? 
C2 K Si1 52.50(4) . . ? 
C6 K Si1 136.07(4) 1_455 . ? 
C2 K Si1 139.74(4) 1_455 . ? 
C13 K Si1 79.45(5) . . ? 
C1 K Si1 130.60(4) 1_455 . ? 
Si2 K Si1 49.944(15) . . ? 
C7 Si1 C10 118.31(12) . . ? 
C7 Si1 C9 111.44(11) . . ? 
C10 Si1 C9 105.37(15) . . ? 
C7 Si1 C8 112.15(12) . . ? 
C10 Si1 C8 105.23(16) . . ? 
C9 Si1 C8 103.00(15) . . ? 
C7 Si1 K 47.34(6) . . ? 
C10 Si1 K 70.99(10) . . ? 
C9 Si1 K 126.31(10) . . ? 
C8 Si1 K 130.18(10) . . ? 
C7 Si2 C12 116.79(12) . . ? 
C7 Si2 C11 111.36(12) . . ? 
C12 Si2 C11 107.03(15) . . ? 
C7 Si2 C13 111.12(11) . . ? 
C12 Si2 C13 106.01(14) . . ? 
C11 Si2 C13 103.56(14) . . ? 
C7 Si2 K 56.50(6) . . ? 
C12 Si2 K 169.86(11) . . ? 
C11 Si2 K 83.02(11) . . ? 
C13 Si2 K 72.14(10) . . ? 
C2 C1 C6 113.21(19) . . ? 
C2 C1 C7 122.93(18) . . ? 
C6 C1 C7 123.86(19) . . ? 
C2 C1 K 80.71(12) . . ? 
C6 C1 K 125.51(13) . . ? 
C7 C1 K 67.02(10) . . ? 
C2 C1 K 72.63(12) . 1_655 ? 
C6 C1 K 71.34(12) . 1_655 ? 
C7 C1 K 124.59(12) . 1_655 ? 
K C1 K 152.91(7) . 1_655 ? 
C3 C2 C1 123.2(2) . . ? 
C3 C2 K 126.10(15) . . ? 
C1 C2 K 74.35(12) . . ? 
C3 C2 K 70.46(13) . 1_655 ? 
C1 C2 K 83.62(12) . 1_655 ? 
K C2 K 157.46(7) . 1_655 ? 
C4 C3 C2 121.0(2) . . ? 
C4 C3 K 73.05(13) . 1_655 ? 
C2 C3 K 85.39(13) . 1_655 ? 
C5 C4 C3 117.9(2) . . ? 
C5 C4 K 79.82(14) . 1_655 ? 
C3 C4 K 81.56(14) . 1_655 ? 
C6 C5 C4 121.7(2) . . ? 
C6 C5 K 85.83(13) . 1_655 ? 
C4 C5 K 74.65(13) . 1_655 ? 
C5 C6 C1 123.0(2) . . ? 
C5 C6 K 69.96(13) . 1_655 ? 
C1 C6 K 84.79(12) . 1_655 ? 
C1 C7 Si1 116.74(14) . . ? 
C1 C7 Si2 119.32(14) . . ? 
Si1 C7 Si2 121.37(11) . . ? 
C1 C7 K 86.71(12) . . ? 
Si1 C7 K 106.10(8) . . ? 
Si2 C7 K 92.95(7) . . ? 
Si1 C8 K 171.12(15) . 3_646 ? 
Si2 C13 K 77.11(9) . . ? 
 
loop_ 
 _geom_torsion_atom_site_label_1 
 _geom_torsion_atom_site_label_2 
 _geom_torsion_atom_site_label_3 
 _geom_torsion_atom_site_label_4 
 _geom_torsion 
 _geom_torsion_site_symmetry_1 
 _geom_torsion_site_symmetry_2 
 _geom_torsion_site_symmetry_3 
 _geom_torsion_site_symmetry_4 
 _geom_torsion_publ_flag 
C4 K Si1 C7 -7.8(8) 1_455 . . . ? 
C5 K Si1 C7 45.16(13) 1_455 . . . ? 
C3 K Si1 C7 171.90(15) 1_455 . . . ? 
C1 K Si1 C7 -34.23(10) . . . . ? 
C8 K Si1 C7 -128.27(11) 3_656 . . . ? 
C2 K Si1 C7 -66.04(10) . . . . ? 
C6 K Si1 C7 76.79(11) 1_455 . . . ? 
C2 K Si1 C7 140.41(11) 1_455 . . . ? 
C13 K Si1 C7 23.66(11) . . . . ? 
C1 K Si1 C7 108.98(10) 1_455 . . . ? 
Si2 K Si1 C7 33.47(9) . . . . ? 
C7 K Si1 C10 -178.02(16) . . . . ? 
C4 K Si1 C10 174.2(8) 1_455 . . . ? 
C5 K Si1 C10 -132.86(17) 1_455 . . . ? 
C3 K Si1 C10 -6.13(18) 1_455 . . . ? 
C1 K Si1 C10 147.75(14) . . . . ? 
C8 K Si1 C10 53.70(15) 3_656 . . . ? 
C2 K Si1 C10 115.93(14) . . . . ? 
C6 K Si1 C10 -101.23(14) 1_455 . . . ? 
C2 K Si1 C10 -37.61(15) 1_455 . . . ? 
C13 K Si1 C10 -154.37(14) . . . . ? 
C1 K Si1 C10 -69.05(14) 1_455 . . . ? 
Si2 K Si1 C10 -144.56(13) . . . . ? 
C7 K Si1 C9 86.54(15) . . . . ? 
C4 K Si1 C9 78.8(8) 1_455 . . . ? 
C5 K Si1 C9 131.70(16) 1_455 . . . ? 
C3 K Si1 C9 -101.56(17) 1_455 . . . ? 
C1 K Si1 C9 52.31(13) . . . . ? 
C8 K Si1 C9 -41.73(14) 3_656 . . . ? 
C2 K Si1 C9 20.50(13) . . . . ? 
C6 K Si1 C9 163.33(13) 1_455 . . . ? 
C2 K Si1 C9 -133.04(13) 1_455 . . . ? 
C13 K Si1 C9 110.20(14) . . . . ? 
C1 K Si1 C9 -164.48(13) 1_455 . . . ? 
Si2 K Si1 C9 120.01(12) . . . . ? 
C7 K Si1 C8 -83.85(16) . . . . ? 
C4 K Si1 C8 -91.6(8) 1_455 . . . ? 
C5 K Si1 C8 -38.68(17) 1_455 . . . ? 
C3 K Si1 C8 88.05(18) 1_455 . . . ? 
C1 K Si1 C8 -118.08(15) . . . . ? 
C8 K Si1 C8 147.88(8) 3_656 . . . ? 
C2 K Si1 C8 -149.89(14) . . . . ? 
C6 K Si1 C8 -7.05(15) 1_455 . . . ? 
C2 K Si1 C8 56.57(15) 1_455 . . . ? 
C13 K Si1 C8 -60.19(14) . . . . ? 
C1 K Si1 C8 25.13(15) 1_455 . . . ? 
Si2 K Si1 C8 -50.38(14) . . . . ? 
C4 K Si2 C7 147.87(10) 1_455 . . . ? 
C5 K Si2 C7 156.52(9) 1_455 . . . ? 
C3 K Si2 C7 175.58(11) 1_455 . . . ? 
C1 K Si2 C7 31.03(9) . . . . ? 
C8 K Si2 C7 3.92(13) 3_656 . . . ? 
C2 K Si2 C7 25.86(8) . . . . ? 
C6 K Si2 C7 179.50(8) 1_455 . . . ? 
C2 K Si2 C7 -155.84(9) 1_455 . . . ? 
C13 K Si2 C7 131.87(13) . . . . ? 
C1 K Si2 C7 -159.18(8) 1_455 . . . ? 
Si1 K Si2 C7 -29.02(7) . . . . ? 
C7 K Si2 C12 -50.9(6) . . . . ? 
C4 K Si2 C12 97.0(6) 1_455 . . . ? 
C5 K Si2 C12 105.7(6) 1_455 . . . ? 
C3 K Si2 C12 124.7(6) 1_455 . . . ? 
C1 K Si2 C12 -19.8(6) . . . . ? 
C8 K Si2 C12 -46.9(6) 3_656 . . . ? 
C2 K Si2 C12 -25.0(6) . . . . ? 
C6 K Si2 C12 128.6(6) 1_455 . . . ? 
C2 K Si2 C12 153.3(6) 1_455 . . . ? 
C13 K Si2 C12 81.0(6) . . . . ? 
C1 K Si2 C12 150.0(6) 1_455 . . . ? 
Si1 K Si2 C12 -79.9(6) . . . . ? 
C7 K Si2 C11 121.42(12) . . . . ? 
C4 K Si2 C11 -90.72(12) 1_455 . . . ? 
C5 K Si2 C11 -82.07(11) 1_455 . . . ? 
C3 K Si2 C11 -63.00(13) 1_455 . . . ? 
C1 K Si2 C11 152.45(11) . . . . ? 
C8 K Si2 C11 125.34(14) 3_656 . . . ? 
C2 K Si2 C11 147.28(11) . . . . ? 
C6 K Si2 C11 -59.08(11) 1_455 . . . ? 
C2 K Si2 C11 -34.43(11) 1_455 . . . ? 
C13 K Si2 C11 -106.72(14) . . . . ? 
C1 K Si2 C11 -37.76(10) 1_455 . . . ? 
Si1 K Si2 C11 92.40(10) . . . . ? 
C7 K Si2 C13 -131.87(13) . . . . ? 
C4 K Si2 C13 16.00(13) 1_455 . . . ? 
C5 K Si2 C13 24.65(12) 1_455 . . . ? 
C3 K Si2 C13 43.71(14) 1_455 . . . ? 
C1 K Si2 C13 -100.83(12) . . . . ? 
C8 K Si2 C13 -127.95(15) 3_656 . . . ? 
C2 K Si2 C13 -106.00(12) . . . . ? 
C6 K Si2 C13 47.64(12) 1_455 . . . ? 
C2 K Si2 C13 72.29(12) 1_455 . . . ? 
C1 K Si2 C13 68.95(12) 1_455 . . . ? 
Si1 K Si2 C13 -160.88(11) . . . . ? 
C7 K C1 C2 -131.89(17) . . . . ? 
C4 K C1 C2 85.00(14) 1_455 . . . ? 
C5 K C1 C2 116.49(12) 1_455 . . . ? 
C3 K C1 C2 61.46(18) 1_455 . . . ? 
C8 K C1 C2 -3.43(13) 3_656 . . . ? 
C6 K C1 C2 145.89(11) 1_455 . . . ? 
C2 K C1 C2 120.8(6) 1_455 . . . ? 
C13 K C1 C2 156.43(14) . . . . ? 
C1 K C1 C2 169.80(12) 1_455 . . . ? 
Si2 K C1 C2 -168.20(13) . . . . ? 
Si1 K C1 C2 -97.25(12) . . . . ? 
C7 K C1 C6 116.2(2) . . . . ? 
C4 K C1 C6 -27.0(2) 1_455 . . . ? 
C5 K C1 C6 4.5(2) 1_455 . . . ? 
C3 K C1 C6 -50.5(2) 1_455 . . . ? 
C8 K C1 C6 -115.39(18) 3_656 . . . ? 
C2 K C1 C6 -112.0(2) . . . . ? 
C6 K C1 C6 33.93(18) 1_455 . . . ? 
C2 K C1 C6 8.9(7) 1_455 . . . ? 
C13 K C1 C6 44.47(17) . . . . ? 
C1 K C1 C6 57.8(3) 1_455 . . . ? 
Si2 K C1 C6 79.84(17) . . . . ? 
Si1 K C1 C6 150.8(2) . . . . ? 
C4 K C1 C7 -143.11(12) 1_455 . . . ? 
C5 K C1 C7 -111.62(12) 1_455 . . . ? 
C3 K C1 C7 -166.65(14) 1_455 . . . ? 
C8 K C1 C7 128.46(12) 3_656 . . . ? 
C2 K C1 C7 131.89(17) . . . . ? 
C6 K C1 C7 -82.23(13) 1_455 . . . ? 
C2 K C1 C7 -107.3(6) 1_455 . . . ? 
C13 K C1 C7 -71.69(11) . . . . ? 
C1 K C1 C7 -58.3(2) 1_455 . . . ? 
Si2 K C1 C7 -36.31(10) . . . . ? 
Si1 K C1 C7 34.63(9) . . . . ? 
C7 K C1 K -121.7(2) . . . 1_655 ? 
C4 K C1 K 95.20(16) 1_455 . . 1_655 ? 
C5 K C1 K 126.69(14) 1_455 . . 1_655 ? 
C3 K C1 K 71.7(2) 1_455 . . 1_655 ? 
C8 K C1 K 6.77(16) 3_656 . . 1_655 ? 
C2 K C1 K 10.20(12) . . . 1_655 ? 
C6 K C1 K 156.09(12) 1_455 . . 1_655 ? 
C2 K C1 K 131.0(5) 1_455 . . 1_655 ? 
C13 K C1 K 166.62(17) . . . 1_655 ? 
C1 K C1 K 180.0 1_455 . . 1_655 ? 
Si2 K C1 K -158.00(17) . . . 1_655 ? 
Si1 K C1 K -87.05(14) . . . 1_655 ? 
C6 C1 C2 C3 1.5(3) . . . . ? 
C7 C1 C2 C3 -178.0(2) . . . . ? 
K C1 C2 C3 -123.2(2) . . . . ? 
K C1 C2 C3 61.6(2) 1_655 . . . ? 
C6 C1 C2 K 124.77(16) . . . . ? 
C7 C1 C2 K -54.75(17) . . . . ? 
K C1 C2 K -175.15(6) 1_655 . . . ? 
C6 C1 C2 K -60.08(16) . . . 1_655 ? 
C7 C1 C2 K 120.40(17) . . . 1_655 ? 
K C1 C2 K 175.15(6) . . . 1_655 ? 
C7 K C2 C3 147.0(2) . . . . ? 
C4 K C2 C3 5.2(2) 1_455 . . . ? 
C5 K C2 C3 37.0(2) 1_455 . . . ? 
C3 K C2 C3 -25.52(19) 1_455 . . . ? 
C1 K C2 C3 120.0(2) . . . . ? 
C8 K C2 C3 -63.6(2) 3_656 . . . ? 
C6 K C2 C3 62.0(2) 1_455 . . . ? 
C2 K C2 C3 -47.4(3) 1_455 . . . ? 
C13 K C2 C3 99.5(2) . . . . ? 
C1 K C2 C3 51.0(7) 1_455 . . . ? 
Si2 K C2 C3 129.2(2) . . . . ? 
Si1 K C2 C3 -178.7(2) . . . . ? 
C7 K C2 C1 27.02(10) . . . . ? 
C4 K C2 C1 -114.75(12) 1_455 . . . ? 
C5 K C2 C1 -82.93(13) 1_455 . . . ? 
C3 K C2 C1 -145.47(12) 1_455 . . . ? 
C8 K C2 C1 176.49(13) 3_656 . . . ? 
C6 K C2 C1 -57.93(17) 1_455 . . . ? 
C2 K C2 C1 -167.35(15) 1_455 . . . ? 
C13 K C2 C1 -20.45(12) . . . . ? 
C1 K C2 C1 -68.9(6) 1_455 . . . ? 
Si2 K C2 C1 9.22(10) . . . . ? 
Si1 K C2 C1 61.32(10) . . . . ? 
C7 K C2 K 14.37(18) . . . 1_655 ? 
C4 K C2 K -127.39(19) 1_455 . . 1_655 ? 
C5 K C2 K -95.6(2) 1_455 . . 1_655 ? 
C3 K C2 K -158.12(17) 1_455 . . 1_655 ? 
C1 K C2 K -12.65(15) . . . 1_655 ? 
C8 K C2 K 163.8(2) 3_656 . . 1_655 ? 
C6 K C2 K -70.6(2) 1_455 . . 1_655 ? 
C2 K C2 K 180.0 1_455 . . 1_655 ? 
C13 K C2 K -33.1(2) . . . 1_655 ? 
C1 K C2 K -81.6(7) 1_455 . . 1_655 ? 
Si2 K C2 K -3.43(19) . . . 1_655 ? 
Si1 K C2 K 48.67(18) . . . 1_655 ? 
C1 C2 C3 C4 -1.0(3) . . . . ? 
K C2 C3 C4 -95.5(2) . . . . ? 
K C2 C3 C4 67.08(19) 1_655 . . . ? 
C1 C2 C3 K -68.1(2) . . . 1_655 ? 
K C2 C3 K -162.58(13) . . . 1_655 ? 
C2 C3 C4 C5 0.0(3) . . . . ? 
K C3 C4 C5 73.68(19) 1_655 . . . ? 
C2 C3 C4 K -73.7(2) . . . 1_655 ? 
C3 C4 C5 C6 0.4(3) . . . . ? 
K C4 C5 C6 75.1(2) 1_655 . . . ? 
C3 C4 C5 K -74.69(19) . . . 1_655 ? 
C4 C5 C6 C1 0.3(3) . . . . ? 
K C5 C6 C1 69.4(2) 1_655 . . . ? 
C4 C5 C6 K -69.1(2) . . . 1_655 ? 
C2 C1 C6 C5 -1.2(3) . . . . ? 
C7 C1 C6 C5 178.3(2) . . . . ? 
K C1 C6 C5 94.0(2) . . . . ? 
K C1 C6 C5 -62.00(19) 1_655 . . . ? 
C2 C1 C6 K 60.81(16) . . . 1_655 ? 
C7 C1 C6 K -119.67(18) . . . 1_655 ? 
K C1 C6 K 155.99(12) . . . 1_655 ? 
C2 C1 C7 Si1 -45.3(2) . . . . ? 
C6 C1 C7 Si1 135.24(18) . . . . ? 
K C1 C7 Si1 -106.38(13) . . . . ? 
K C1 C7 Si1 45.5(2) 1_655 . . . ? 
C2 C1 C7 Si2 152.62(16) . . . . ? 
C6 C1 C7 Si2 -26.8(3) . . . . ? 
K C1 C7 Si2 91.53(13) . . . . ? 
K C1 C7 Si2 -116.55(13) 1_655 . . . ? 
C2 C1 C7 K 61.09(18) . . . . ? 
C6 C1 C7 K -118.38(18) . . . . ? 
K C1 C7 K 151.92(10) 1_655 . . . ? 
C10 Si1 C7 C1 96.6(2) . . . . ? 
C9 Si1 C7 C1 -25.7(2) . . . . ? 
C8 Si1 C7 C1 -140.59(18) . . . . ? 
K Si1 C7 C1 94.50(16) . . . . ? 
C10 Si1 C7 Si2 -101.68(18) . . . . ? 
C9 Si1 C7 Si2 135.98(15) . . . . ? 
C8 Si1 C7 Si2 21.10(18) . . . . ? 
K Si1 C7 Si2 -103.80(14) . . . . ? 
C10 Si1 C7 K 2.12(17) . . . . ? 
C9 Si1 C7 K -120.22(13) . . . . ? 
C8 Si1 C7 K 124.91(13) . . . . ? 
C12 Si2 C7 C1 83.3(2) . . . . ? 
C11 Si2 C7 C1 -153.33(18) . . . . ? 
C13 Si2 C7 C1 -38.4(2) . . . . ? 
K Si2 C7 C1 -87.88(16) . . . . ? 
C12 Si2 C7 Si1 -77.91(17) . . . . ? 
C11 Si2 C7 Si1 45.44(17) . . . . ? 
C13 Si2 C7 Si1 160.34(15) . . . . ? 
K Si2 C7 Si1 110.89(13) . . . . ? 
C12 Si2 C7 K 171.20(12) . . . . ? 
C11 Si2 C7 K -65.45(13) . . . . ? 
C13 Si2 C7 K 49.45(13) . . . . ? 
C4 K C7 C1 62.09(17) 1_455 . . . ? 
C5 K C7 C1 88.63(13) 1_455 . . . ? 
C3 K C7 C1 93.3(6) 1_455 . . . ? 
C8 K C7 C1 -58.32(13) 3_656 . . . ? 
C2 K C7 C1 -25.65(10) . . . . ? 
C6 K C7 C1 118.62(11) 1_455 . . . ? 
C2 K C7 C1 167.30(13) 1_455 . . . ? 
C13 K C7 C1 91.70(12) . . . . ? 
C1 K C7 C1 147.51(12) 1_455 . . . ? 
Si2 K C7 C1 119.22(14) . . . . ? 
Si1 K C7 C1 -116.90(15) . . . . ? 
C4 K C7 Si1 178.99(10) 1_455 . . . ? 
C5 K C7 Si1 -154.47(8) 1_455 . . . ? 
C3 K C7 Si1 -149.8(6) 1_455 . . . ? 
C1 K C7 Si1 116.90(15) . . . . ? 
C8 K C7 Si1 58.58(11) 3_656 . . . ? 
C2 K C7 Si1 91.26(10) . . . . ? 
C6 K C7 Si1 -124.48(8) 1_455 . . . ? 
C2 K C7 Si1 -75.80(16) 1_455 . . . ? 
C13 K C7 Si1 -151.40(12) . . . . ? 
C1 K C7 Si1 -95.58(10) 1_455 . . . ? 
Si2 K C7 Si1 -123.87(13) . . . . ? 
C4 K C7 Si2 -57.14(16) 1_455 . . . ? 
C5 K C7 Si2 -30.60(11) 1_455 . . . ? 
C3 K C7 Si2 -26.0(6) 1_455 . . . ? 
C1 K C7 Si2 -119.22(14) . . . . ? 
C8 K C7 Si2 -177.54(8) 3_656 . . . ? 
C2 K C7 Si2 -144.87(11) . . . . ? 
C6 K C7 Si2 -0.60(10) 1_455 . . . ? 
C2 K C7 Si2 48.08(16) 1_455 . . . ? 
C13 K C7 Si2 -27.53(8) . . . . ? 
C1 K C7 Si2 28.29(11) 1_455 . . . ? 
Si1 K C7 Si2 123.87(13) . . . . ? 
C7 Si1 C8 K 177.5(10) . . . 3_646 ? 
C10 Si1 C8 K -52.6(11) . . . 3_646 ? 
C9 Si1 C8 K 57.6(11) . . . 3_646 ? 
K Si1 C8 K -130.4(10) . . . 3_646 ? 
C7 Si2 C13 K -41.74(10) . . . . ? 
C12 Si2 C13 K -169.58(11) . . . . ? 
C11 Si2 C13 K 77.93(12) . . . . ? 
C7 K C13 Si2 27.35(8) . . . . ? 
C4 K C13 Si2 -167.21(10) 1_455 . . . ? 
C5 K C13 Si2 -155.08(12) 1_455 . . . ? 
C3 K C13 Si2 -152.47(9) 1_455 . . . ? 
C1 K C13 Si2 58.00(9) . . . . ? 
C8 K C13 Si2 105.03(16) 3_656 . . . ? 
C2 K C13 Si2 67.78(10) . . . . ? 
C6 K C13 Si2 -129.94(11) 1_455 . . . ? 
C2 K C13 Si2 -125.60(9) 1_455 . . . ? 
C1 K C13 Si2 -115.94(10) 1_455 . . . ? 
Si1 K C13 Si2 14.77(8) . . . . ? 
 
_diffrn_measured_fraction_theta_max    0.999 
_diffrn_reflns_theta_full              27.97 
_diffrn_measured_fraction_theta_full   0.999 
_refine_diff_density_max    0.272 
_refine_diff_density_min   -0.167 
_refine_diff_density_rms    0.047 

#===END
